# Supplementary material
Source: PubMed Central journal article supplement (PMC4767988)

Supplementary Material to “Gyrase Mutations are Associated with Variable Levels of Fluoroquinolone Resistance in *Mycobacterium tuberculosis*”

Supplementary Table 1: **Sequence and coordinates of the molecular inversion probes used for target sequence capture.**

Some probes are duplicates except for one SNP in one of the arms.

BRIDGE = AGATCGGAAGAGCGTCTGTAGGGAAAGCTGAGCAAATGTTATCGAGGTC

| # Probe name      | Start | End Sequence                                                           |
|-------------------|-------|------------------------------------------------------------------------|
| gyrB-gyrA_W_1_1   | 4973  | 5112 CAGGAAGAAAGATGTCCGACGCACG-(BRIDGE)-GGTCCGCGCGACACCTACG            |
| gyrB-gyrA_W_2_2   | 5113  | 5252 TTCGGATCTGTGGCTGCCAGAG-(BRIDGE)-GCGCGTTAGATGGGTAAAAACGAGG         |
| gyrB-gyrA_W_3_1   | 5253  | 5392 ACCATCTCATTGGGAGGTGGTCGAC-(BRIDGE)-AAAAGAAGGCCAAGACGAATACGGCG     |
| gyrB-gyrA_W_4_2   | 5393  | 5532 CGGCATACCGACCGTCGACGT-(BRIDGE)-AACGCGGTGACGAGGCGAT                |
| gyrB-gyrA_W_4_2a  | 5393  | 5532 CGGCATACCGACCGTCGACGT-(BRIDGE)-AACGCGGTGACGAGGCGAT                |
| gyrB-gyrA_W_5_1   | 5533  | 5672 CGAGATCAAGCGCGACGGTACG-(BRIDGE)-GGTGTGACACAACATACATGCCGGC         |
| gyrB-gyrA_W_6_2   | 5673  | 5812 GGAATACGACTTCGAAACCGTCGCC-(BRIDGE)-AGTGGTCTCAGTTTATGAGAAGTCGGAACC |
| gyrB-gyrA_W_7_1   | 5813  | 5952 TCGGCAAGTGAACGCGCAGC-(BRIDGE)-CGCCGGCTGCAAGAGATGGC                |
| gyrB-gyrA_W_8_2   | 5953  | 6092 TTCGCGCAAGGGCACCGGGC-(BRIDGE)-CGAATCCACTGCACCCACAAAAGT            |
| gyrB-gyrA_W_9_1   | 6093  | 6232 GCTGACGTCGGTGGTGAACAAGTAC-(BRIDGE)-ACGAGGTGGAGATCGCGATGCA         |
| gyrB-gyrA_W_10_2  | 6233  | 6372 CAGACCAAGACCAAGTTGGGCAACAC-(BRIDGE)-GCCAAGGACCGCAAGCTACTGAAG      |
| gyrB-gyrA_W_10_2a | 6233  | 6372 CAGACCAAGACCAAGTTGGGCAACAC-(BRIDGE)-GCCAAGGACCGCAAGCTACTGAAG      |
| gyrB-gyrA_W_11_1  | 6373  | 6512 CGCGGCACGTAAGGCACGAG-(BRIDGE)-CGAGGTCAAATCGTTTGTGAGAAAGGTC        |
| gyrB-gyrA_W_12_2  | 6513  | 6652 CGGTTCTGCAAAAAGCGGTGCG-(BRIDGE)-AGTTGGTGCAGCGTAAAGAGCG            |
| gyrB-gyrA_W_13_1  | 6653  | 6792 CCGGATCCACGACGAGTTCTGA-(BRIDGE)-GATTCTGATTTCCAGGGGACTTCCGC        |
| gyrB-gyrA_W_14_2  | 6793  | 6932 CGAGAACGGGATGTGTTTTGGCAC-(BRIDGE)-TATCGGCAAGCTGCGTACCACA          |
| gyrB-gyrA_W_15_1  | 6933  | 7072 GGAAGACGGCATTGAGCGTACAAG-(BRIDGE)-AACCGCGCTGTACAAACTCAAGTG        |
| gyrB-gyrA_W_16_2  | 7073  | 7212 ATGGGCCAGGACGTCGACGC-(BRIDGE)-GGTCTAGTGAAATGGACGCTAAGGAGTTG       |
| gyrB-gyrA_W_17_1  | 7213  | 7352 TCGCTCGACCGGATCGAACCG-(BRIDGE)-GCGGCGCAGTTTATCACCCG               |
| gyrB-gyrA_W_17_1a | 7213  | 7352 TCGCTCGACCGGATCGAACCG-(BRIDGE)-GCGGCGCAGTTTATCACCCG               |
| gyrB-gyrA_W_18_2  | 7353  | 7492 TGCTCTATGCAATGTTGATTCGGCTT-(BRIDGE)-GTTGACATCGAGCAGGAGATGCAGC     |
| gyrB-gyrA_W_18_2a | 7353  | 7492 TGCTCTATGCAATGTTGATTCGGCTT-(BRIDGE)-GTTGACATCGAGCAGGAGATGCAGC     |
| gyrB-gyrA_W_19_1  | 7493  | 7632 GCTGCGCTACCGCTGGTGG-(BRIDGE)-CCGCCGACCGCAGCCAGC                   |
| gyrB-gyrA_W_20_2  | 7633  | 7772 AGGAGACAGTCGATTTTCCTAAGTACGAC-(BRIDGE)-ACGCCAGGGCAACTTCGGC        |
| gyrB-gyrA_W_21_1  | 7773  | 7912 GCCGACGCGTGTCTGGGC-(BRIDGE)-GGCCGGTGAAGAGCCGAC                    |
| gyrB-gyrA_W_22_2  | 7913  | 8052 CAAAAGTGGCCGCGCTCCA-(BRIDGE)-GCTGAGAATCAGCAGCCGAC                 |
| gyrB-gyrA_W_22_2a | 7913  | 8052 CAAAAGTGGCCGCGCTCCA-(BRIDGE)-GCTGAGAATCAGCAGCCGAC                 |
| gyrB-gyrA_W_23_1  | 8053  | 8192 TCCGAGACGGCAAGCTGGCC-(BRIDGE)-TTCGAATGCGCGAGTTGTTGAGG             |
| gyrB-gyrA_W_23_1a | 8053  | 8192 TCCGAGACGGCAAGCTGGCC-(BRIDGE)-TTCGAATGCGCGAGTTGTTGAGG             |
| gyrB-gyrA_W_24_2  | 8193  | 8332 GCAGACAGCTTTGGCCCAA-(BRIDGE)-GGCATTCCAACATTGAGGACCACTAGC          |
| gyrB-gyrA_W_24_2a | 8193  | 8332 GCAGACAGCTTTGGCCCAA-(BRIDGE)-GGCATTCCAACATTGAGGACCACTAGC          |
| gyrB-gyrA_W_25_1  | 8333  | 8472 GGCAAAAGCAGCGACGCCACATTC-(BRIDGE)-CATGCTAGCGATCTGACGCGGG          |
| gyrB-gyrA_W_26_2  | 8473  | 8612 CCAGGCCAGGCAATCCTGGAC-(BRIDGE)-TGCAGCGCTGTTAAAGCG                 |
| gyrB-gyrA_W_27_1  | 8613  | 8752 ATCGTGCAGCAGCAACTCGC-(BRIDGE)-ATGAGTTGCGGCGCTGGC                  |
| gyrB-gyrA_W_28_2  | 8753  | 8892 GGGATACGCCAAGCGCACCAAGA-(BRIDGE)-CGAAATCGTGGACGGCACGGC            |
| gyrB-gyrA_W_29_1  | 8893  | 9032 CTTACACCCAGGGACGGGTTTAT-(BRIDGE)-CCGATCTGTATCGCAGCCAGAAACG        |
| gyrB-gyrA_W_29_1a | 8893  | 9032 CTTACACCCAGGGACGGGTTTAT-(BRIDGE)-CCGATCTGTATCGCAGCCAGAAACG        |
| gyrB-gyrA_W_30_2  | 9033  | 9172 ACCGACGCCCTACCTGGT-(BRIDGE)-CGGGCCAAGGCTACGACTTGC                 |
| gyrB-gyrA_W_31_1  | 9173  | 9312 GTGTTCCGCGCGCAGCAGC-(BRIDGE)-GCTGGCACTCGCAACGGGC                  |
| gyrB-gyrA_W_31_1a | 9173  | 9312 GTGTTCCGCGCGCAGCAGC-(BRIDGE)-GCTGGCACTCGCAACGGGC                  |
| gyrB-gyrA_W_32_2  | 9313  | 9452 GCTGCTGCTGTAACGCTGCTG-(BRIDGE)-TGCTGCTGCTCGGCCAACG                |
| gyrB-gyrA_W_33_1  | 9453  | 9592 CGGGCGGCGCAGGTTGGTTGG-(BRIDGE)-CGTGAAGGCACCTATCTGCTGGTGG          |
| gyrB-gyrA_W_34_2  | 9593  | 9732 TGAATCTGGCGAGGGCGACA-(BRIDGE)-GGCGTTGATGTCGACGACGACA              |
| gyrB-gyrA_W_35_1  | 9733  | 9872 CGTAGCGATCTGAGGAGGAATCGGG-(BRIDGE)-CACTGTTGGCCATCGCGCGC           |
| gyrB-gyrA_W_36_2  | 9873  | 10012 CACATCGGGCAGCGACCGGG-(BRIDGE)-CAGTAGGCTCGGACGGCG                 |
| gyrB-gyrA_C_1_2   | 5023  | 5162 TCTCAGCCGGGACCGGAGC-(BRIDGE)-CGGGCCAGGGCCGATCTT                   |
| gyrB-gyrA_C_2_1   | 5163  | 5302 GGTGCGACACCACTGTACCGTAT-(BRIDGE)-TTGAGAATGGTATAGACGACGCGC         |
| gyrB-gyrA_C_3_2   | 5303  | 5442 TTGCGGACGGCTCCAGCCC-(BRIDGE)-ACTACGTTCACTGTGGTTGCATAACCGG         |
| gyrB-gyrA_C_4_1   | 5443  | 5582 GACACGCCATCTCAAGCAGC-(BRIDGE)-CATACGCTCGGAGTCGAACTTGC             |
| gyrB-gyrA_C_5_2   | 5583  | 5722 CGCCGTGACAGCACCAGATATCG-(BRIDGE)-CCCTTGCTTGAAGCCAGGGG             |
| gyrB-gyrA_C_6_1   | 5723  | 5862 CCCGCTCTTGGTTCGGCGC-(BRIDGE)-AGGTTGATGGTCAGCCCTTGTGA              |
| gyrB-gyrA_C_7_2   | 5863  | 6002 CTTGGGTCACCCCTCTGTCGGTC-(BRIDGE)-CCGGATAGTGAAGGTTGCGGCTCT         |
| gyrB-gyrA_C_8_1   | 6003  | 6142 GTTTCACGAAGTCCACAGGCCAC-(BRIDGE)-CACCGACTCCGAATACCCGGCG           |
| gyrB-gyrA_C_9_2   | 6143  | 6282 TGTGATGGTGTGGCGAAGGTGTG-(BRIDGE)-TCACCGGTGAGGTTGGGTTCC            |

| # Probe name      | Start | End Sequence                                                      |
|-------------------|-------|-------------------------------------------------------------------|
| gyrB-gyrA_C_10_1  | 6283  | 6422 GGCCAGGCCTTCCCGGATATCG-(BRIDGE)-AGTGGGTACAGCTGTTTCGTTACAGACC |
| gyrB-gyrA_C_11_2  | 6423  | 6562 GTCGGTGGGGTTGGCTTCAAACC-(BRIDGE)-CTTGCCGGGCAATCCACCGATG      |
| gyrB-gyrA_C_12_1  | 6563  | 6702 CGTGGAACGGCAATCGGCCAG-(BRIDGE)-ACATTGATGATCTTGCCGCGCAGC      |
| gyrB-gyrA_C_13_2  | 6703  | 6842 CGTTCGATGCGCGCTTCTCC-(BRIDGE)-CATCGCGTCGGCCATCAGC            |
| gyrB-gyrA_C_14_1  | 6843  | 6982 CAGCGTGAAATATGTTGGCCGTCAG-(BRIDGE)-TGCGAATTCGGGTCACTGCG      |
| gyrB-gyrA_C_14_1a | 6843  | 6982 CAGCGTGAAATATGTTGGCCGTCAG-(BRIDGE)-TGCGAATTCGGGTCACTGCG      |
| gyrB-gyrA_C_15_2  | 6983  | 7122 TCGCGCTCGCGGTGCGAGTA-(BRIDGE)-GGATCCATGGTGGTCTCCCAACTC       |
| gyrB-gyrA_C_16_1  | 7123  | 7262 ACTTGACGCAACACACGAACCGAG-(BRIDGE)-CATCCAGGAACCGAATCCTTGGCG   |
| gyrB-gyrA_C_17_2  | 7263  | 7402 CAATCGAACGAGGTTGCGTTAGA-(BRIDGE)-CTCATCGCATAGTCGATGTAGCTGCGC |
| gyrB-gyrA_C_18_1  | 7403  | 7542 GCGCGCGCCGACGATCAGC-(BRIDGE)-TGGTCTCGGCAACCGACCGG            |
| gyrB-gyrA_C_19_2  | 7543  | 7682 CGTGC GG GTGGTAGTTGCCA-(BRIDGE)-CATCGCCGCGGTGGGTCACT         |
| gyrB-gyrA_C_19_2a | 7543  | 7682 CGTGC GG GTGGTAGTTGCCA-(BRIDGE)-CATCGCCGCGGTGGGTCACT         |
| gyrB-gyrA_C_19_2b | 7543  | 7682 CGTGC GG GTGGTAGTTGCCA-(BRIDGE)-CATCGTCGCGGTGGGTCACT         |
| gyrB-gyrA_C_20_1  | 7683  | 7822 CAGCCGGCTTCGGGTACCT-(BRIDGE)-AGCAGTTGGGGAACCGGCT             |
| gyrB-gyrA_C_21_2  | 7823  | 7962 TGCCGCTGACCCGTTGGCC-(BRIDGE)-CCATGACCGCGCCAGGGTC             |
| gyrB-gyrA_C_22_1  | 7963  | 8102 GTCCGGGCTTTAACCCGCC-(BRIDGE)-GGTACGACCGCGGGAATCCTCT          |
| gyrB-gyrA_C_23_2  | 8103  | 8242 GGCAACTCGGTGATCACCAGCGA-(BRIDGE)-ATGCGTAAACCGACCCGATCGCT     |
| gyrB-gyrA_C_24_1  | 8243  | 8382 GCATCGCGCTTGATCTCGATGACG-(BRIDGE)-GCTGGTCCAGCCGACCGTG        |
| gyrB-gyrA_C_25_2  | 8383  | 8522 AGTTGGTGGTCAACGTAATAGCGGATCA-(BRIDGE)-CAGTGAATGACCTCGTCCAGCG |
| gyrB-gyrA_C_26_1  | 8523  | 8662 ACGTCTCCGACGCCCGGAT-(BRIDGE)-TCGTGATGATGCGCTGGCG             |
| gyrB-gyrA_C_27_2  | 8663  | 8802 CTCGGCCTCGATTTTGCCAGG-(BRIDGE)-CCGCGATGATCCGGGTACGC          |
| gyrB-gyrA_C_28_1  | 8803  | 8942 CGTCGCTGACGCTCCGTCGG-(BRIDGE)-CGCACCTGACGCGCCTTGC            |
| gyrB-gyrA_C_28_1a | 8803  | 8942 CGTCGCTGACGCTCCGTCGG-(BRIDGE)-CGCACCTGACGCGCCTTGC            |
| gyrB-gyrA_C_29_2  | 8943  | 9082 CGACGATGTCGCTCTGCTCAACCC-(BRIDGE)-TGCCCGCGCGCGTCCGGGA        |
| gyrB-gyrA_C_30_1  | 9083  | 9222 GGCTAACAGTTGGCCACGTGC-(BRIDGE)-CGAAGTCGCTGAGCTTGGACTTTTTCAC  |
| gyrB-gyrA_C_31_2  | 9223  | 9362 TCCGCCGAGCGATTGGAGT-(BRIDGE)-GTCGGTCCGCGAGAACCCTGATGG        |
| gyrB-gyrA_C_32_1  | 9363  | 9502 CCCATTGGCCGACGCGCTC-(BRIDGE)-CGTTTCGATAGCCCCCTGACG           |
| gyrB-gyrA_C_33_2  | 9503  | 9642 ACCGGGTATTCTCGATCGCGGTA-(BRIDGE)-CGCCGGAAGTGACGGCATAACG      |
| gyrB-gyrA_C_34_1  | 9643  | 9782 CGCGGTGCGGATCAGCCAC-(BRIDGE)-GGCATTATCGTCCCACTTTCTTCGG       |
| gyrB-gyrA_C_35_2  | 9783  | 9922 TCTGCGCGTTGGCGTCCAC-(BRIDGE)-TGCAGTACCCCGACTCTAACAC          |

Supplementary Table 2: Parameters used to call variants from MIP read data.

| Program                           | Version | Parameters                                                                                                          |
|-----------------------------------|---------|---------------------------------------------------------------------------------------------------------------------|
| megablast<br>(used by MIPCleaner) | 2.2.14  | -p 90 -W 10 -e 1e-1 -X16 -JF -m8 -FF<br>-v9000000 -b9000000                                                         |
| Bowtie                            | 0.12.7  | -q -k 2 -l 20 -m 5 --best --strata<br>(with the additional filtering out of alignments with NM:i:x tags having x>5) |
| samtools                          | 0.1.18  | mpileup -u -R -B -q0 -Q0 -C0 -d1000000                                                                              |
| bcftools                          | 0.1.18  | view -vg -p0.05                                                                                                     |
| vcfutils.pl                       | 0.1.18  | varFilter -d 10 -a 5 -D1000000 -W10<br>-10 -20 -30 -40 -e0                                                          |
| Stampy                            | 1.0.23  | Default                                                                                                             |
| Platypus                          | 0.5.2   | Default. Filtered variants with platypusfilter='badreads' or quality≤30 or purity <40%.                             |

Supplementary Table 3: Isolate status at lineage defining SNPs listed in Coll *et. al.* (PMID 25176035) or Feuerriegel *et. al.* (PMID 24458512). Additionally the Euro-American X-type SNP Q139H\_embB was not present in any isolate.



















|      |   |    |    |    |    |   |   |   |    |   |   |   |   |   |   |   |   |   |   |   |   |   |
|------|---|----|----|----|----|---|---|---|----|---|---|---|---|---|---|---|---|---|---|---|---|---|
| 2493 | 0 | 0  | 0  | 0  | 1  | 0 | 0 | 0 | 1  | 0 | 0 | 0 | 0 | 0 | 0 | 0 | 0 | 0 | 0 | 0 | 0 | 2 |
| 2496 | 0 | 0  | 0  | 0  | 0  | 0 | 0 | 0 | 0  | 0 | 0 | 0 | 0 | 0 | 0 | 0 | 0 | 0 | 0 | 0 | 0 | 0 |
| 2497 | 0 | 0  | 0  | 0  | 0  | 0 | 0 | 0 | 0  | 0 | 0 | 0 | 0 | 0 | 0 | 0 | 0 | 0 | 0 | 0 | 0 | 0 |
| 2506 | 0 | 0  | 0  | 0  | 0  | 0 | 0 | 0 | 0  | 0 | 0 | 0 | 0 | 0 | 0 | 0 | 0 | 0 | 0 | 0 | 0 | 0 |
| 2507 | 0 | 0  | 0  | 0  | 1  | 0 | 0 | 0 | 1  | 0 | 0 | 0 | 0 | 0 | 0 | 0 | 0 | 0 | 0 | 0 | 0 | 2 |
| 2510 | 0 | 1  | 0  | 0  | 0  | 0 | 0 | 0 | 0  | 0 | 0 | 0 | 0 | 0 | 0 | 0 | 0 | 0 | 0 | 0 | 0 | 1 |
| 2519 | 0 | 0  | 0  | 0  | 0  | 0 | 0 | 0 | 0  | 0 | 0 | 0 | 0 | 0 | 0 | 0 | 0 | 0 | 0 | 0 | 0 | 0 |
| 2578 | 0 | 1  | 0  | 0  | 0  | 0 | 0 | 0 | 0  | 0 | 0 | 0 | 0 | 0 | 0 | 0 | 0 | 0 | 0 | 0 | 0 | 1 |
| 2592 | 0 | 0  | 0  | 0  | 0  | 0 | 0 | 0 | 0  | 0 | 0 | 0 | 0 | 0 | 0 | 0 | 0 | 0 | 0 | 0 | 0 | 0 |
| SUM  | 5 | 68 | 87 | 45 | 27 | 4 | 0 | 7 | 26 | 0 | 0 | 0 | 0 | 0 | 0 | 0 | 0 | 0 | 0 | 0 | 0 |   |

Supplementary Table 4: Isolates with more than one *gyr* mutation and their moxifloxacin and ofloxacin

MICs. \*These two mutations were exactly co-linear

| ID   | Mutation number | MXF MIC | OFX MIC | mutations                                                                                         |
|------|-----------------|---------|---------|---------------------------------------------------------------------------------------------------|
| 181  | 2               | 0.125   | <1      | <i>gyrB_I310M*</i> , <i>gyrB_S700T*</i>                                                           |
| 1167 | 2               | 1       | 4       | <i>gyrA_D94Y</i> , <i>gyrA_P102S</i>                                                              |
| 1370 | 2               | 1       | 4       | <i>gyrA_D94Y</i> , <i>gyrA_T267I</i>                                                              |
| 1578 | 2               | 4       | 4       | <i>gyrA_A90V</i> , <i>gyrB_V340L</i>                                                              |
| 1914 | 2               | 4       | 6       | <i>gyrA_D94G</i> , <i>gyrB_V340L</i>                                                              |
| 2029 | 3               | 8       | >10     | <i>gyrA_D94Y</i> , <i>gyrB_I310M</i>                                                              |
| 2044 | 2               | >8      | >10     | <i>gyrA_D94G</i> , <i>gyrB_N538T</i>                                                              |
| 2049 | 2               | >8      | >10     | <i>gyrA_D94N</i> , <i>gyrB_N538T</i>                                                              |
| 2600 | 3               | 1       | <1      | <i>gyrB_I310M*</i> , <i>gyrB_S700T*</i> , <i>gyrB_R485H</i>                                       |
| 2772 | 2               | <0.125  | <1      | <i>gyrB_I310M*</i> , <i>gyrB_S700T*</i>                                                           |
| 3139 | 2               | <0.125  | <1      | <i>gyrB_I310M*</i> , <i>gyrB_S700T*</i>                                                           |
| 150  | 2               | 4       | 2       | <i>gyrA_S91P</i> , <i>gyrA_D94G</i>                                                               |
| 272  | 2               | 0.25    | <1      | <i>gyrB_I310M*</i> , <i>gyrB_S700T*</i>                                                           |
| 492  | 2               | 0.25    | <1      | <i>gyrB_V340L</i> , <i>gyrB_A453S</i>                                                             |
| 949  | 3               | 1       | 2       | <i>gyrA_D94A</i> , <i>gyrB_I310M*</i> , <i>gyrB_S700T*</i>                                        |
| 950  | 2               | 4       | 2       | <i>gyrA_D94G</i> , <i>gyrB_V340L</i>                                                              |
| 951  | 5               | <0.125  | 2       | <i>gyrA_A90V</i> , <i>gyrB_I310M*</i> , <i>gyrB_S700T*</i> , <i>gyrB_R485C</i> , <i>gyrB_E78K</i> |
| 1279 | 2               | 1       | 4       | <i>gyrA_A90V</i> , <i>gyrB_V340L</i>                                                              |
| 1280 | 2               | 1       | 4       | <i>gyrA_A90V</i> , <i>gyrB_V340L</i>                                                              |
| 1281 | 2               | 1       | 4       | <i>gyrA_D94A</i> , <i>gyrA_T267I</i>                                                              |
| 1293 | 3               | 1       | 4       | <i>gyrA_A90V</i> , <i>gyrB_I310M*</i> , <i>gyrB_S700T*</i>                                        |
| 1316 | 3               | 1       | 4       | <i>gyrA_A90V</i> , <i>gyrB_I310M*</i> , <i>gyrB_S700T*</i>                                        |
| 1444 | 2               | 1       | 4       | <i>gyrA_A90V</i> , <i>gyrB_V340L</i>                                                              |
| 1570 | 2               | 4       | 4       | <i>gyrA_A90V</i> , <i>gyrB_V340L</i>                                                              |

|             |   |        |     |                          |
|-------------|---|--------|-----|--------------------------|
| <b>1770</b> | 2 | 4      | 6   | gyrB_I310M*, gyrB_S700T* |
| <b>1811</b> | 2 | 4      | 6   | gyrA_D94G, gyrA_R392C    |
| <b>2017</b> | 2 | 4      | >10 | gyrA_D94G, gyrB_V340L    |
| <b>2028</b> | 2 | 8      | >10 | gyrA_D94G, gyrB_N538T    |
| <b>2135</b> | 2 | 0.25   | <1  | gyrB_I310M*, gyrB_S700T* |
| <b>3092</b> | 2 | <0.125 | <1  | gyrB_I310M*, gyrB_S700T* |
| <b>3202</b> | 2 | <0.125 | <1  | gyrB_I310M*, gyrB_S700T* |
| <b>3431</b> | 2 | <0.125 | <1  | gyrB_I310M*, gyrB_S700T* |
| <b>2170</b> | 2 | 0.25   | <1  | gyrB_I310M*, gyrB_S700T* |
| <b>899</b>  | 2 | 0.5    | 2   | gyrA_D94A, gyrB_V340L    |

Supplementary Figure 1: Isolate neighbor joining tree. Subtree branches were colored if a neighbor had a fingerprint from MIRU or spoligotyping as follows: LAM: olive, T1: purple, X: red, Beijing: dark blue, H: grey, T2: light blue, unknown: black.

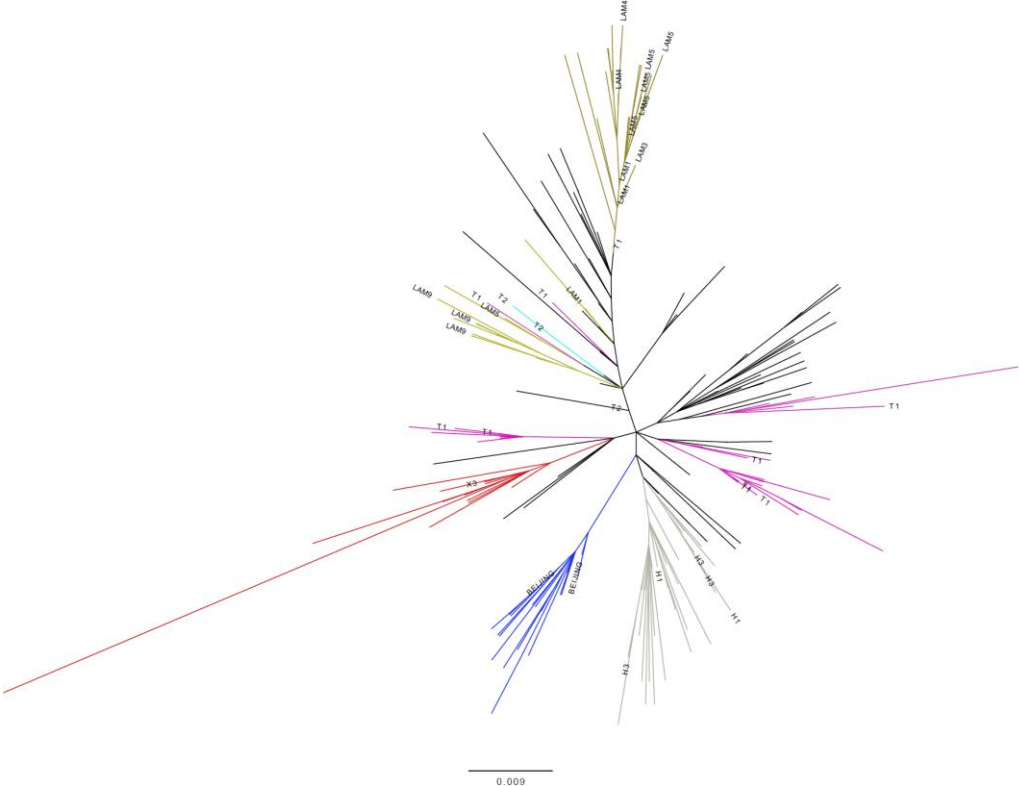

Supplement: JCM.02775-15_zjm999094842so1.pdf [file JCM.02775-15_zjm999094842so1.pdf]
